# Supplementary material for: Investigating the Antibacterial Effects of Synthetic Gamma-Lactam Heterocycles on Methicillin-Resistant Staphylococcus aureus Strains and Assessing the Safety and Effectiveness of Lead Compound MFM514
Source: MDPI journal article supplement (doi:10.3390/molecules28062575), 2023-03-12
Supplement: s1 [file s1]

# Investigating the Antibacterial Effects of Synthetic Gamma-Lactam Heterocycles on Methicillin-Resistant *Staphylococcus aureus* Strains and Assessing the Safety and Effectiveness of Lead Compound MFM514

Saiful Azmi Johari <sup>1</sup>, Mastura Mohtar <sup>1</sup>, Mohd Fazli Mohammad <sup>2\*</sup>, Fatin Nur Ain Abdul Rashid <sup>2</sup>, Muhamad Zulfaqar Bacho <sup>2</sup>, Azman Mohamed <sup>1</sup>, Mohamad Jemain Mohamad Ridhwan <sup>3</sup>, Sharifah Aminah Syed Mohamad <sup>4</sup>

<sup>1</sup> Bioactivity Programme, Natural Products Division, Forest Research Institute Malaysia (FRIM), 52109 Kepong, Selangor, Malaysia

<sup>2</sup> Organic Synthesis Laboratory, Institute of Science, Universiti Teknologi MARA (UiTM), Puncak Alam Campus, Puncak Alam, Kuala Selangor 42300, Selangor, Malaysia

<sup>3</sup> Pharmacy Programme, Sultan Azlan Shah Allied Health Sciences College, 31250 Tanjung Rambutan, Perak, Malaysia

<sup>4</sup> Faculty of Applied Sciences, Universiti Teknologi MARA (UiTM), 40450 Shah Alam, Selangor, Malaysia.

\* Correspondence: mohdfazli@uitm.edu.my

**Abstract:** Methicillin-resistant *Staphylococcus aureus* (MRSA) continues to be as one of the main causes of hospital-acquired infections in all regions of the world while linezolid is one of the only commercially-available oral antibiotic available against this dangerous Gram-positive pathogen. In this study, the antibacterial activity from 32 analogues of synthetic gamma-lactam heterocycles against MRSA were determined. Amongst screened analogues for the minimum inhibitory concentration (MIC) assay, compound **MFM514** displayed good inhibitory activity with MIC values of 7.8-15.6 µg/ml against 30 MRSA and 12 methicillin-sensitive *S. aureus* (MSSA) clinical isolates while cytotoxicity evaluations displayed a mean inhibitory concentration (IC<sub>50</sub>) value of > 625 µg/ml, displaying a potential to becoming as a lead compound. In subsequent animal studies for **MFM514**, a single-dose oral acute toxicity test revealed an estimated mean lethal dose (LD<sub>50</sub>) value of < 5000 mg/kg while in the mice infection test, a mean effective dose (ED<sub>50</sub>) value of 29.39 mg/kg was obtained via oral administration. These results suggests that gamma-lactam carbon-skeleton particularly **MFM514** is highly recommended to be evaluated further as a new safe and efficacious orally delivered antibacterial agent against MRSA.

**Keywords:** gamma-lactam; antibacterial; oral anti-MRSA agent; acute toxicity; mice infection

---

**Table S1.** Haematological analysis of untreated and treated mice with **MFM514**

| <b>Haematological values</b>                  | <b>Untreated<br/>(5% Tween 80)</b> | <b>MFM514 at<br/>2000 mg/kg</b> |
|-----------------------------------------------|------------------------------------|---------------------------------|
| White blood cells ( $\times 10^9/\text{L}$ )  | $5.8 \pm 1.7$                      | $6.5 \pm 1.7$                   |
| Lymphocyte ( $\times 10^9/\text{L}$ )         | $4.6 \pm 1.4$                      | $5.1 \pm 1.55$                  |
| Monocyte ( $\times 10^9/\text{L}$ )           | $0.18 \pm 0.08$                    | $0.22 \pm 0.04$                 |
| Granulocyte ( $\times 10^9/\text{L}$ )        | $1.0 \pm 0.5$                      | $1.1 \pm 0.2$                   |
| Lymphocyte (%)                                | $80.2 \pm 5.6$                     | $77.7 \pm 2.4$                  |
| Monocyte (%)                                  | $3.2 \pm 0.7$                      | $3.6 \pm 0.6$                   |
| Granulocyte (%)                               | $16.5 \pm 5.3$                     | $18.8 \pm 1.9$                  |
| Red blood cells ( $\times 10^{12}/\text{L}$ ) | $8.7 \pm 0.4$                      | $8.8 \pm 0.6$                   |
| Hemoglobin (g/dL)                             | $14.2 \pm 1.3$                     | $14.0 \pm 0.7$                  |
| Hematocrit (%)                                | $33.9 \pm 16.3$                    | $41.7 \pm 1.8$                  |
| Mean corpuscular volume (fL)                  | $47.2 \pm 0.6$                     | $47.6 \pm 1.8$                  |
| Mean cell hemoglobin (pg)                     | $15.9 \pm 0.2$                     | $15.6 \pm 0.6$                  |
| Mean cell haemoglobin concentration (g/dL)    | $33.6 \pm 0.6$                     | $33.5 \pm 0.5$                  |
| Red blood cell distribution width (%)         | $16.1 \pm 0.7$                     | $16.5 \pm 0.6$                  |
| Platelets counts ( $\times 10^9/\text{L}$ )   | $659.0 \pm 72.6$                   | $^{1}882.6 \pm 173.6$           |
| Mean platelet volume (fL)                     | $4.4 \pm 0.7$                      | $4.3 \pm 0.2$                   |
| Platelet distribution width                   | $16.5 \pm 0.5$                     | $16.4 \pm 0.2$                  |
| Plateletcrit (%)                              | $0.3 \pm 0.1$                      | $0.4 \pm 0.1$                   |

<sup>1</sup>a significant value change was detected

Values were expressed as mean  $\pm$  standard deviation (SD) of five mice.  $p < 0.05$  was considered statistically significant difference

**Table S2.** Biochemistry analysis of untreated and treated mice with **MF514**

| <b>Biochemistry analysis</b>       | <b>Untreated<br/>(5% Tween 80)</b> | <b>MF514 at<br/>2000 mg/kg</b> |
|------------------------------------|------------------------------------|--------------------------------|
| <b>Liver Profile</b>               |                                    |                                |
| Total protein (g/L)                | 68.7 ± 29.6                        | 61.7 ± 6.9                     |
| Albumin (g/L)                      | 37.8 ± 15.5                        | 36.9 ± 2.0                     |
| Alanine phosphatase (U/L)          | 124.4 ± 61.7                       | 127.4 ± 16.7                   |
| Alanine transaminase (ALT) (U/L)   | 87.3 ± 39.6                        | 87.3 ± 9.7                     |
| Aspartate transaminase (AST) (U/L) | 102.5 ± 42.2                       | 95.5 ± 12.8                    |
| AST/ALT ratio                      | 1.17                               | 1.09                           |
| <b>Renal Profile</b>               |                                    |                                |
| Uric acid (μmol/L)                 | 104.1 ± 42.6                       | 104.0 ± 36.9                   |
| <b>Lipid Profile</b>               |                                    |                                |
| High density lipoprotein (mmol/L)  | 1.8 ± 0.8                          | 1.9 ± 0.3                      |
| Triglycerides (mmol/L)             | 0.8 ± 0.3                          | 0.9 ± 0.1                      |
| Glucose (mmol/L)                   | 10.0 ± 4.2                         | 9.6 ± 1.3                      |

Values were expressed as mean ± standard deviation (SD) of five mice.  $p < 0.05$  was considered statistically significant difference

**Table S3.** Biochemistry analysis of untreated and treated mice with **MF514**

| Organ examined | Relative organ weight (g)  |                        |
|----------------|----------------------------|------------------------|
|                | Untreated<br>(5% Tween 80) | MF514 at<br>2000 mg/kg |
| Heart          | 0.41 ± 0.05                | 0.43 ± 0.03            |
| Thymus         | 0.18 ± 0.03                | 0.16 ± 0.02            |
| Lung           | 0.72 ± 0.11                | 0.77 ± 0.15            |
| Liver          | 4.47 ± 0.65                | 5.20 ± 0.56            |
| Left kidney    | 0.46 ± 0.04                | 0.49 ± 0.05            |
| Right kidney   | 0.44 ± 0.04                | 0.47 ± 0.04            |
| Spleen         | 0.43 ± 0.15                | 0.44 ± 0.08            |
| Intestine      | 11.95 ± 1.28               | 12.28 ± 0.79           |
| Left ovary     | 0.022 ± 0.001              | 0.033 ± 0.012          |
| Right ovary    | 0.021 ± 0.001              | 0.030 ± 0.014          |
| Brain          | 1.28 ± 0.08                | 1.34 ± 0.03            |

Values were expressed as mean ± standard deviation (SD) of five mice.  $p < 0.05$  was considered statistically significant difference
